# Supplementary material for: What is really social about social insect cognition?
Source: Frontiers journal article supplement (doi:10.3389/fevo.2022.1001045), 2023-01-06
Supplement: Table_1.XLSX [file Table_1.XLSX]

## Sheet: Words replaced by another
label	replace by
adult fly	fly
ageing	age
amyloid beta peptide	amyloid beta
amyloid precursor protein	amyloid beta
ant colony	ant
apidae	bee
apis cerana	bee
apis mellifera	honeybee
bees	bee
bombus impatien	bee
bombus terrestris	bee
bumble bee	bee
bumblebee	bee
butterfly species	butterfly
cognitive impairment	cognitive dysfunction
colour	color
comparative analysis	comparative study
d melanogaster	drosophila
drosophila melanogaster	drosophila
drosophila model	drosophila
fly model	fly
food source	food
fruit fly	drosophila
genes	gene
honey bee	honeybee
honey bees	honeybee
individual bee	bee
label	Replace by
life span	lifespan
cognitive decline	cognitive dysfunction
cognitive deficit	cognitive dysfunction
disorder	disease
mellifera	honeybee
neurodegenerative disease	neurodegeneration
neurodegenerative disorder	neurodegeneration
p fuscatus	wasp
paper wasp	wasp
pathology	disease
per	proboscis extension response
pigeon	pigeon
social wasp	wasp
sturnus vulgaris	european starling
vespidae	wasp
vespula germanica	wasp

## Sheet: Words removed from the study
Words removed from study
animal
animal kingdom
bird
female
future research
i e
iat
iii
insect
absence
animal model
apsect
article
case
control
data
difference
effect
example
factor
hypothesis
idea
increase
level
mice
month
mouse
mouse model
mu m
nothing
overview
paper
part
participant
pattern
presence
present study
prey
procedure
procedure
question
recent work
representation
research
review
significant decrease
significant difference
significant improvement
species
study
subset
term
test
topic
treatment
type
use
value
vector
vice versa
view
way
week
work
year
